# Supplementary material
Source: PubMed Central journal article supplement (PMC5722236)
Supplement: NIHMS917580-supplement.pdf [file NIHMS917580-supplement.pdf]

**Online Supplement**

1. **SupplementalTable1. Least squares means by *APOE* genotype for measure of A $\beta$  binding**
2. **Supplemental Table 2. Unadjusted means by *APOE* genotype of neuropsychological test performance measures and their correlations with PVC BP<sub>ND</sub>**
3. **Supplemental Table 3. Correlations between neuropsychological test performance measures and cortical A $\beta$**

**Supplemental Table 1. Least squares means\* by APOE genotype for a measure of A $\beta$  binding**

|                                                   | APOE Genotype                      |              |         |                                    |              |                      |                                    |              |                      |                      |
|---------------------------------------------------|------------------------------------|--------------|---------|------------------------------------|--------------|----------------------|------------------------------------|--------------|----------------------|----------------------|
|                                                   | $\epsilon 3\epsilon 3$<br>(n = 15) |              |         | $\epsilon 3\epsilon 4$<br>(n = 15) |              |                      | $\epsilon 4\epsilon 4$<br>(n = 15) |              | Overall-<br>APOE     |                      |
|                                                   | Mean                               | 95% CI       | p value | Mean                               | 95% CI       | p value <sup>†</sup> | Mean                               | 95% CI       | p value <sup>†</sup> | p value <sup>‡</sup> |
| <b>BP<sub>ND</sub> – Partial Volume Corrected</b> |                                    |              |         |                                    |              |                      |                                    |              |                      |                      |
| Frontal Cortex                                    | 0.164                              | 0.100, 0.268 | -----   | 0.332                              | 0.196, 0.561 | 0.097                | 0.432                              | 0.357, 0.523 | <0.001               | 0.001                |
| Lateral Temporal                                  | 0.114                              | 0.062, 0.212 | -----   | 0.237                              | 0.137, 0.409 | 0.128                | 0.311                              | 0.252, 0.383 | <0.001               | 0.006                |
| Lateral Parietal                                  | 0.247                              | 0.150, 0.405 | -----   | 0.442                              | 0.283, 0.689 | 0.131                | 0.517                              | 0.427, 0.625 | 0.001                | 0.023                |
| Posterior Cingulate                               | 0.246                              | 0.167, 0.359 | -----   | 0.217                              | 0.125, 0.379 | 0.712                | 0.477                              | 0.370, 0.614 | 0.004                | 0.003                |
| Precuneus                                         | 0.243                              | 0.186, 0.317 | -----   | 0.375                              | 0.251, 0.560 | 0.127                | 0.610                              | 0.516, 0.713 | <0.001               | <0.001               |
| Mean Cortical                                     | 0.138                              | 0.081, 0.238 | -----   | 0.270                              | 0.163, 0.450 | 0.125                | 0.356                              | 0.294, 0.431 | <0.001               | 0.003                |

\*Least squares means are obtained from separate generalized linear models in which APOE genotype is the main explanatory variable and age and sex are covariates; generalized estimating equations yielding a robust variance estimator are used to account for clustering induced by matching by age and sex and a natural logarithm transformation is used to accommodate a positively skewed outcome with an inverse transformation returning the least squares means to their original scale.

p values are for significance tests comparing the <sup>†</sup>two respective APOE genotype categories to the reference  $\epsilon 3\epsilon 3$  APOE Genotype category, as well as for the <sup>‡</sup>overall APOE genotype effect. They are not adjusted for the multiplicity of comparisons.



**Supplemental Table 2. Unadjusted means by *APOE* genotype of neuropsychological test performance measures and their correlations with PVC BP<sub>ND</sub>**

|                                  | <i>APOE</i> Genotype             |       |                                  |       |                                  |       | X <sup>2a</sup> | P Value* |  |
|----------------------------------|----------------------------------|-------|----------------------------------|-------|----------------------------------|-------|-----------------|----------|--|
|                                  | $\epsilon 3\epsilon 3$<br>(n=15) |       | $\epsilon 3\epsilon 4$<br>(n=15) |       | $\epsilon 4\epsilon 4$<br>(n=15) |       |                 |          |  |
|                                  | Mean                             | SD    | Mean                             | SD    | Mean                             | SD    |                 |          |  |
| <b>Language</b>                  |                                  |       |                                  |       |                                  |       |                 |          |  |
| Boston Naming Test               | 56.3                             | ±3.2  | 58.4                             | ±1.7  | 57.5                             | ±2.4  | 3.90            | 0.14     |  |
| Category Fluency                 | 72.0                             | ±14.3 | 72.7                             | ±15.7 | 74.7                             | ±12.2 | 0.17            | 0.92     |  |
| Letter Fluency (FAS)             | 46.4                             | ±13.8 | 42.9                             | ±13.0 | 42.5                             | ±12.8 | 0.81            | 0.67     |  |
| <b>Executive Function</b>        |                                  |       |                                  |       |                                  |       |                 |          |  |
| Digit Symbol (WAIS-III)          | 11.0                             | ±2.6  | 10.4                             | ±2.6  | 10.4                             | ±2.6  | 0.73            | 0.69     |  |
| Trail Making Test, Part B        | 59.1                             | ±20.9 | 60.5                             | ±14.2 | 59.7                             | ±14.6 | 0.49            | 0.78     |  |
| Stroop color word score          | 46.0                             | ±5.8  | 43.9                             | ±6.8  | 45.6                             | ±5.0  | 1.00            | 0.61     |  |
| <b>Verbal and Visual Memory</b>  |                                  |       |                                  |       |                                  |       |                 |          |  |
| CVLT free delayed recall         | 11.1                             | ±2.8  | 10.8                             | ±2.5  | 11.8                             | ±4.2  | 1.94            | 0.38     |  |
| CVLT recognition hits            | 15.1                             | ±0.6  | 14.9                             | ±1.0  | 14.6                             | ±1.7  | 0.49            | 0.78     |  |
| Logical Memory I                 | 13.5                             | ±3.9  | 13.3                             | ±4.2  | 12.6                             | ±3.3  | 0.22            | 0.89     |  |
| Logical Memory II                | 12.9                             | ±3.9  | 11.7                             | ±4.5  | 11.6                             | ±3.3  | 1.19            | 0.55     |  |
| Visual Reproductions II          | 11.4                             | ±2.7  | 11.3                             | ±3.6  | 11.6                             | ±2.2  | 0.08            | 0.96     |  |
| <b>Visuospatial/Construction</b> |                                  |       |                                  |       |                                  |       |                 |          |  |
| Block Design (WAIS-III)          | 11.6                             | ±2.3  | 11.8                             | ±3.2  | 11.2                             | ±2.1  | 0.48            | 0.79     |  |
| <b>Olfactory Identification</b>  |                                  |       |                                  |       |                                  |       |                 |          |  |
| UPSIT (Smell Test)               | 34.4                             | ±3.7  | 34.5                             | ±4.8  | 34.8                             | ±4.0  | 0.49            | 0.78     |  |

\*Chi-square statistics and their p values are from Kruskal-Wallis analyses having 2 degrees of freedom with *APOE* genotype as the categorical explanatory variable; a nonparametric test is used because not all measures had Gaussian distributions. There is no adjustment for multiplicity of comparisons.

| <b>Supplemental Table 3. Correlations between neuropsychological test performance measures and cortical A<math>\beta</math></b> |             |          |
|---------------------------------------------------------------------------------------------------------------------------------|-------------|----------|
|                                                                                                                                 | Spearman r* | P Value* |
| <b>Language</b>                                                                                                                 |             |          |
| Boston Naming Test                                                                                                              | 0.39        | 0.01     |
| Category Fluency                                                                                                                | 0.20        | 0.19     |
| Letter Fluency (FAS)                                                                                                            | 0.26        | 0.08     |
| <b>Executive Function</b>                                                                                                       |             |          |
| Digit Symbol (WAIS-III)                                                                                                         | -0.06       | 0.71     |
| Trail Making Test, Part B                                                                                                       | 0.13        | 0.39     |
| Stroop color word score                                                                                                         | 0.23        | 0.13     |
| <b>Verbal and Visual Memory</b>                                                                                                 |             |          |
| CVLT free delayed recall                                                                                                        | -0.05       | 0.75     |
| CVLT recognition hits                                                                                                           | -0.22       | 0.14     |
| Logical Memory I                                                                                                                | 0.02        | 0.86     |
| Logical Memory II                                                                                                               | -0.06       | 0.71     |
| Visual Reproductions II                                                                                                         | 0.20        | 0.18     |
| <b>Visuospatial/Construction</b>                                                                                                |             |          |
| Block Design (WAIS-III)                                                                                                         | 0.10        | 0.52     |
| <b>Olfactory Identification</b>                                                                                                 |             |          |
| UPSIT (Smell Test)                                                                                                              | -0.19       | 0.22     |

\*Spearman rank correlation coefficients and their p values are from correlations with the mean cortical A $\beta$  burden (BP<sub>ND</sub>) with partial volume correction. There is no adjustment for multiplicity of comparisons.
